# Supplementary material
Source: Springer Nature journal article supplement (https://www.springermedizin.de/resource/supplementary/12933_2007_106_MOESM1_ESM.pdf/9539624)

## A. Non-abdominal obesity

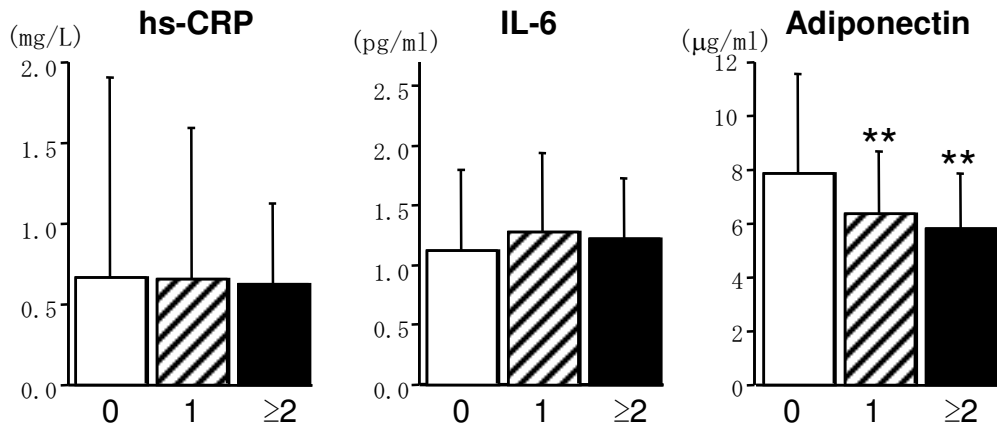

## B. Abdominal obesity

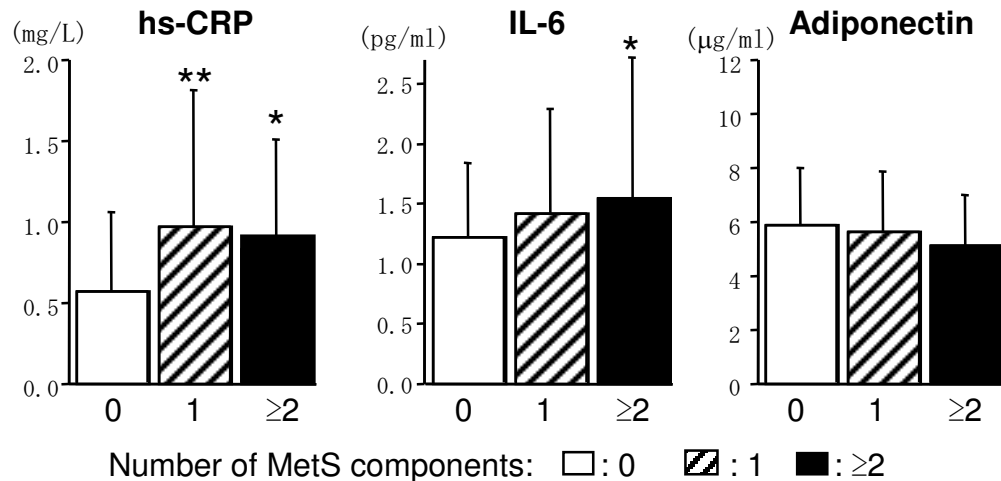

Supplement: MOESM1 [file 9539624]
